# Supplementary material
Source: publisher figshare collection journal article supplement (https://frontiersin.figshare.com/ndownloader/files/18548726)
Supplement: Supplementary file [file 18548726]

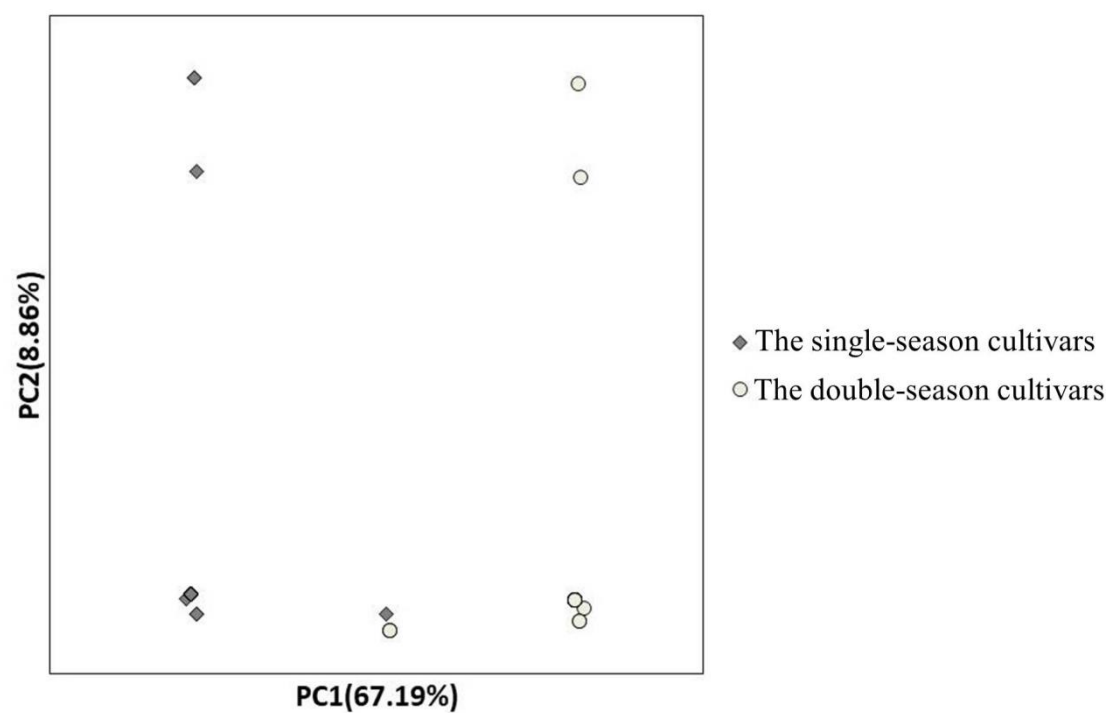

Fig. S3 Principal-Coordinate-Analysis (PCoA) of cultivated *Zizania latifolia* accessions. The two ecotypes were divergent (the filled spades: the single-season cultivars; the hollowed circles: the double season cultivars).
